# Supplementary material for: Comprehensive Health Risk Assessment of Trace Metals in PM 2.5 : An Urban Perspective
Source: Research Square preprint supplement (doi:10.21203/rs.3.rs-6324283/v1), 2025-04-21
Supplement: Supplementary file 1 [file e106460db38d27f122292c35.docx]

**Supplementary 1**

Input parameters in Multiple-Path Particle Dosimetry model software V3.04

| **Parameter** | **Upper Respiratory Tract volume (ml)** | **Functional residual capacity (ml)** | **Total lung capacity (ml)** | **Tidal volume** | **Breathing Frequency (per minute)** |
| --- | --- | --- | --- | --- | --- |
| 3 month | 2.45 | 17.97 | 43.98 | 30.44 | 39 |
| 28 month | 7.92 | 30.81 | 90.37 | 100.1 | 26 |
| 3 year | 9.47 | 48.2 | 125.15 | 121.3 | 24 |
| 8 year | 21.03 | 501.32 | 1143.93 | 278.2 | 17 |
| 14 year | 30.63 | 987.56 | 1943.27 | 388.1 | 16 |
| 18 year | 37.38 | 1159.38 | 2666.51 | 446.7 | 15 |
| 21 year | 42.27 | 2123.75 | 4765.00 | 477.2 | 14 |

**Supplementary 2**

The parameter value for Respiratory Flow Rate

| **Age**  **(Year)** | **Male Tidal Volume (L)** | **Female Tidal Volume (L)** | **Respiratory Rate (breath/min)** |
| --- | --- | --- | --- |
| 13-19 | 0.3705 | 0.3185 | 13.5 |
| 20 | 0.4485 | 0.351 | 13.5 |
| 30 | 0.468 | 0.364 | 13.5 |
| 40 | 0.455 | 0.3705 | 13.5 |
| 50 | 0.4485 | 0.39 | 13.5 |
| 60 | 0.4225 | 0.377 | 19.4 |
| 70 | 0.3965 | 0.3575 | 19.4 |

**Supplementary 3**

Parameter values for the calculation of health risk assessment by age category

| **Parameter** | **Definition** | **Value according to age category** | | | |
| --- | --- | --- | --- | --- | --- |
| **Infants (0-1 year)** | **Children**  **(2-5 years)** | **Toddler**  **(6-12 years)** | **Adult**  **(19-75 years)** |
| C | Mean Concentration PM2.5 (μg/m3) | Findings | | | |
| EF | Exposure Frequency (day/year) | 350 | 350 | 350 | 350 |
| ED | Exposure Duration (year) | 1 | 6 | 12 | 30 |
| ATnoncar | Average Time (day) AT (day) = ED x 365 day | 365 | 2190 | 4380 | 10,950 |
| ATcarc | Average Time (day) AT (day) = 70 x 365 day | 25,550 | 25,550 | 25,550 | 25,550 |
| BW | Body Weight (kg) | 11.3 | 22.6 | 45.3 | 71.8 |
| InhR (ADD) | Inhalation Rate (m3/day) | 9.2 | 46.74 | 21.02 | 21.4 |
| InhR (AHD) | Inhalation Rate (m3/hour) | 0.38 | 0.7 | 0.88 | 0.89 |

**Supplementary 4**

Classification of cancer risk

| **Cancer Risk** | **Definition** |
| --- | --- |
| More than 1 x 10-4 | Definite risk |
| 1 x 10-4 to 1 x 10-5 | Probable risk |
| 1 x 10-5 to 1 x 10-6 | Possible risk |
| Less than 1 x 10-6 | Negligible risk |

**Supplementary 5**

ADD & AHD PM2.5

| Age Group | SW monsoon (n = 17) | | IM monsoon (n = 13) | |
| --- | --- | --- | --- | --- |
| **Acute** | **Chronic** | **Acute** | **Chronic** |
| **AHD**  **(μg/m3-hour)** | **ADD**  **(μg/kg-day)** | **AHD**  **(μg/m3-hour)** | **ADD**  **(μg/kg-day)** |
| Infant | 6.71 × 10-1 | 1.56 × 101 | 4.42 × 10-1 | 1.02 × 101 |
| Toddler | 6.18 × 10-1 | 1.42 × 101 | 4.07 × 10-1 | 9.33 |
| Children | 3.88 × 10-1 | 8.88 | 2.55 × 10-1 | 5.84 |
| Adult | 2.47 × 10-1 | 5.70 | 1.63 × 10-1 | 3.75 |

**Supplementary 6**

LADD PM2.5

| Age Group | SW monsoon (n = 17) | IM monsoon (n = 13) |
| --- | --- | --- |
| Infant | 2.23 × 10-1 | 1.46 × 10-1 |
| Toddler | 1.21 | 7.99 × 10-1 |
| Children | 1.52 | 1.00 |
| Adult | 2.44 | 1.61 |

**Supplementary 7**

ADD & AHD PM2.5

| **Age Group** | **Element** | SW monsoon (n = 17) | | IM monsoon (n = 13) | |
| --- | --- | --- | --- | --- | --- |
| **Acute** | **Chronic** | **Acute** | **Chronic** |
| **AHD**  **(μg/m3-hour)** | **ADD**  **(μg/kg-day)** | **AHD**  **(μg/m3-hour)** | **ADD**  **(μg/kg-day)** |
| Infant | Mg | 1.34 × 10-3 | 3.10 × 10-2 | 1.20 × 10-3 | 2.79 × 10-2 |
| Fe | 3.09 × 10-3 | 7.17 × 10-2 | 1.44 × 10-3 | 3.34 × 10-2 |
| Cr | 8.87 × 10-5 | 2.06 × 10-3 | 2.10 × 10-5 | 4.87 × 10-4 |
| Ni | 4.12 × 10-5 | 9.58 × 10-4 | 1.45 × 10-5 | 3.37 × 10-4 |
| Co | 3.36 × 10-6 | 7.81 × 10-5 | 2.35 × 10-6 | 5.46 × 10-5 |
| As | 1.75 × 10-5 | 4.07 × 10-4 | 1.46 × 10-5 | 3.39 × 10-4 |
| Cd | 9.18 × 10-6 | 2.13 × 10-4 | 6.83 × 10-6 | 1.59 × 10-4 |
| Pb | 2.92 × 10-4 | 6.79 × 10-3 | 3.62 × 10-4 | 8.39 × 10-3 |
| Mn | 1.13 × 10-4 | 2.61 × 10-3 | 5.00 × 10-5 | 1.16 × 10-3 |
| Zn | 1.22 × 10-3 | 2.83 × 10-2 | 1.53 × 10-3 | 3.56 × 10-2 |
| Cu | 1.17 × 10-3 | 2.72 × 10-2 | 7.08 × 10-4 | 1.64 × 10-2 |
| V | 2.35 × 10-5 | 5.46 × 10-4 | 1.04 × 10-5 | 2.43 × 10-4 |
|  |  |  |  |  |
| Toddler | Mg | 1.23 × 10-3 | 2.82 × 10-2 | 1.11 × 10-3 | 2.53 × 10-2 |
| Fe | 2.84 × 10-3 | 6.52 × 10-2 | 1.32 × 10-3 | 3.03 × 10-2 |
| Cr | 8.17 × 10-5 | 1.87 × 10-3 | 1.93 × 10-5 | 4.43 × 10-4 |
| Ni | 3.80 × 10-5 | 8.71 × 10-4 | 1.34 × 10-5 | 3.07 × 10-4 |
| Co | 3.10 × 10-6 | 7.10 × 10-5 | 2.17 × 10-6 | 4.97 × 10-5 |
| As | 1.61 × 10-5 | 3.70 × 10-4 | 1.34 × 10-5 | 3.08 × 10-4 |
| Cd | 8.45 × 10-6 | 1.94 × 10-4 | 6.29 × 10-6 | 1.44 × 10-4 |
| Pb | 2.69 × 10-4 | 6.18 × 10-3 | 3.33 × 10-4 | 7.64 × 10-3 |
| Mn | 1.04 × 10-4 | 2.38 × 10-3 | 4.61 × 10-5 | 1.06 × 10-3 |
| Zn | 1.12 × 10-3 | 2.58 × 10-2 | 1.41 × 10-3 | 3.24 × 10-2 |
| Cu | 1.08 × 10-3 | 2.48 × 10-2 | 6.52 × 10-4 | 1.49 × 10-2 |
| V | 2.17 × 10-5 | 4.97 × 10-4 | 9.62 × 10-6 | 2.21 × 10-4 |
|  |  |  |  |  |
| Children | Mg | 7.72 × 10-4 | 1.77 × 10-2 | 6.93 × 10-4 | 1.59 × 10-2 |
| Fe | 1.78 × 10-3 | 4.09 × 10-2 | 8.30 × 10-4 | 1.90 × 10-2 |
| Cr | 5.12 × 10-5 | 1.17 × 10-3 | 1.21 × 10-5 | 2.78 × 10-4 |
| Ni | 2.38 × 10-5 | 5.46 × 10-4 | 8.40 × 10-6 | 1.92 × 10-4 |
| Co | 1.94 × 10-6 | 4.45 × 10-5 | 1.36 × 10-6 | 3.11 × 10-5 |
| As | 1.01 × 10-5 | 2.32 × 10-4 | 8.43 × 10-6 | 1.93 × 10-4 |
| Cd | 5.30 × 10-6 | 1.21 × 10-4 | 3.94 × 10-6 | 9.03 × 10-5 |
| Pb | 1.69 × 10-4 | 3.87 × 10-3 | 2.09 × 10-4 | 4.78 × 10-3 |
| Mn | 6.50 × 10-5 | 1.49 × 10-3 | 2.89 × 10-5 | 6.62 × 10-4 |
| Zn | 7.04 × 10-4 | 1.61 × 10-2 | 8.86 × 10-4 | 2.03 × 10-2 |
| Cu | 6.77 × 10-4 | 1.55 × 10-2 | 4.09 × 10-4 | 9.36 × 10-3 |
| V | 1.36 × 10-5 | 3.11 × 10-4 | 6.04 × 10-6 | 1.38 × 10-4 |
|  |  |  |  |  |
| Adult | Mg | 4.93 × 10-4 | 1.14 × 10-2 | 4.42 × 10-4 | 1.02 × 10-2 |
| Fe | 1.14 × 10-3 | 2.62 × 10-2 | 5.30 × 10-4 | 1.22 × 10-2 |
| Cr | 3.27 × 10-5 | 7.54 × 10-4 | 7.74 × 10-6 | 1.78 × 10-4 |
| Ni | 1.52 × 10-5 | 3.51 × 10-4 | 5.36 × 10-6 | 1.24 × 10-4 |
| Co | 1.24 × 10-6 | 2.86 × 10-5 | 8.68 × 10-7 | 2.00 × 10-5 |
| As | 6.46 × 10-6 | 1.49 × 10-4 | 5.38 × 10-6 | 1.24 × 10-4 |
| Cd | 3.38 × 10-6 | 7.80 × 10-5 | 2.52 × 10-6 | 5.80 × 10-5 |
| Pb | 1.08 × 10-4 | 2.48 × 10-3 | 1.33 × 10-4 | 3.07 × 10-3 |
| Mn | 4.15 × 10-5 | 9.56 × 10-4 | 1.84 × 10-5 | 4.25 × 10-4 |
| Zn | 4.49 × 10-4 | 1.04 × 10-2 | 5.65 × 10-4 | 1.30 × 10-2 |
| Cu | 4.32 × 10-4 | 9.96 × 10-3 | 2.61 × 10-4 | 6.01 × 10-3 |
| V | 8.67 × 10-6 | 2.00 × 10-4 | 3.85 × 10-6 | 8.88 × 10-5 |

**Supplementary 7**

ADD Trace metal

| Age group | Element | SW monsoon (n = 17) | IM monsoon (n = 13) |
| --- | --- | --- | --- |
| Infant | Cr | 1.02 × 10-5 | 6.96 × 10-6 |
| Ni | 1.37 × 10-5 | 4.82 × 10-6 |
| Co | 1.12 × 10-6 | 7.81 × 10-7 |
| As | 5.81 × 10-6 | 4.84 × 10-6 |
| Cd | 3.04 × 10-6 | 2.26 × 10-6 |
| Pb | 9.70 × 10-5 | 1.20 × 10-4 |
|  |  |  |
| Toddler | Cr | 1.61 × 10-4 | 3.80 × 10-5 |
| Ni | 7.47 × 10-5 | 2.63 × 10-5 |
| Co | 6.09 × 10-6 | 4.26 × 10-6 |
| As | 3.17 × 10-5 | 2.64 × 10-5 |
| Cd | 1.66 × 10-5 | 1.24 × 10-5 |
| Pb | 5.29 × 10-4 | 6.55 × 10-3 |
|  |  |  |
| Children | Cr | 2.01 × 10-4 | 4.76 × 10-5 |
| Ni | 9.36 × 10-5 | 3.30 × 10-5 |
| Co | 7.63 × 10-6 | 5.34 × 10-6 |
| As | 3.98 × 10-5 | 3.31 × 10-5 |
| Cd | 2.08 × 10-5 | 1.55 × 10-5 |
| Pb | 6.63 × 10-4 | 8.20 × 10-4 |
|  |  |  |
| Adult | Cr | 1.30 × 10-5 | 7.65 × 10-5 |
| Ni | 1.21 × 10-7 | 5.29 × 10-5 |
| Co | 3.70 × 10-7 | 8.57 × 10-6 |
| As | 6.38 × 10-5 | 5.31 × 10-5 |
| Cd | 3.34 × 10-5 | 2.49 × 10-5 |
| Pb | 1.06 × 10-3 | 1.32 × 10-3 |
